# Supplementary material for: Differences in Compositions of Oral and Fecal Microbiota between Patients with Obesity and Controls
Source: MDPI journal article supplement (doi:10.3390/medicina57070678), 2021-06-30

**Figure S1.** Alpha diversity for oral microbiota.

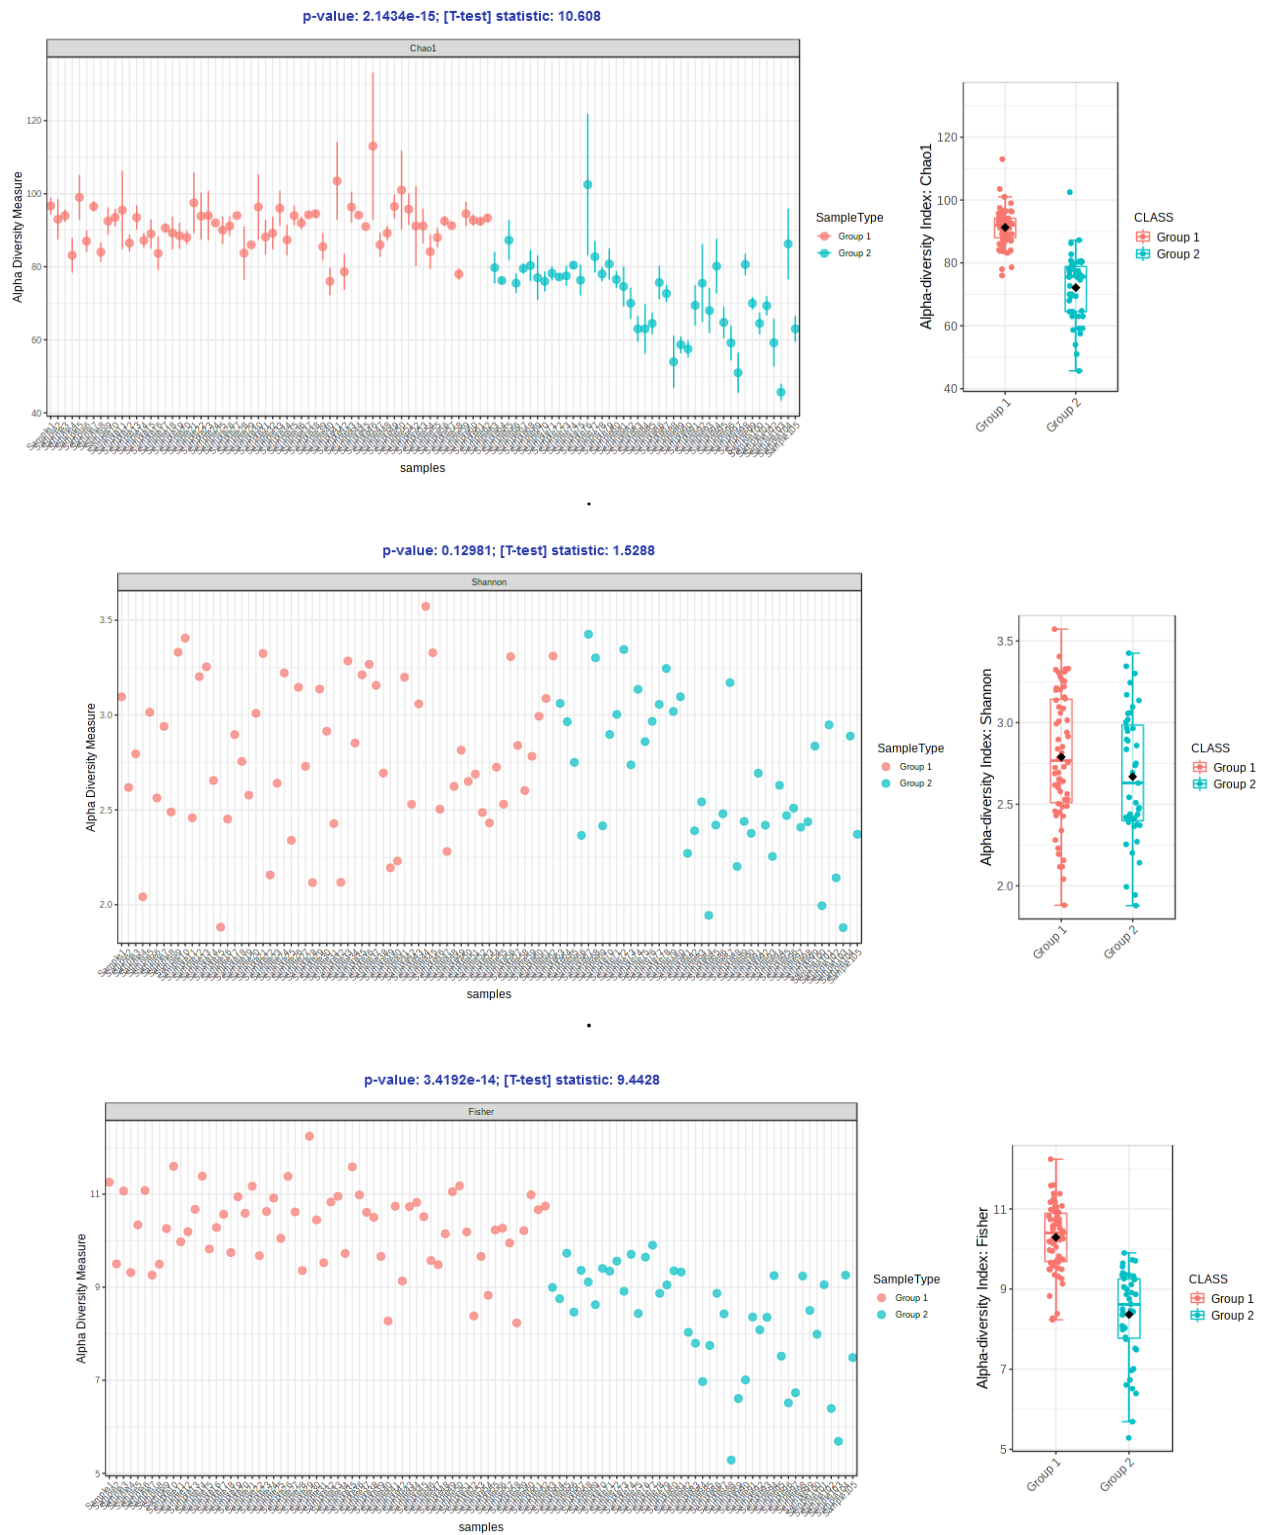

Figure S2. Alpha diversity for fecal microbiota.

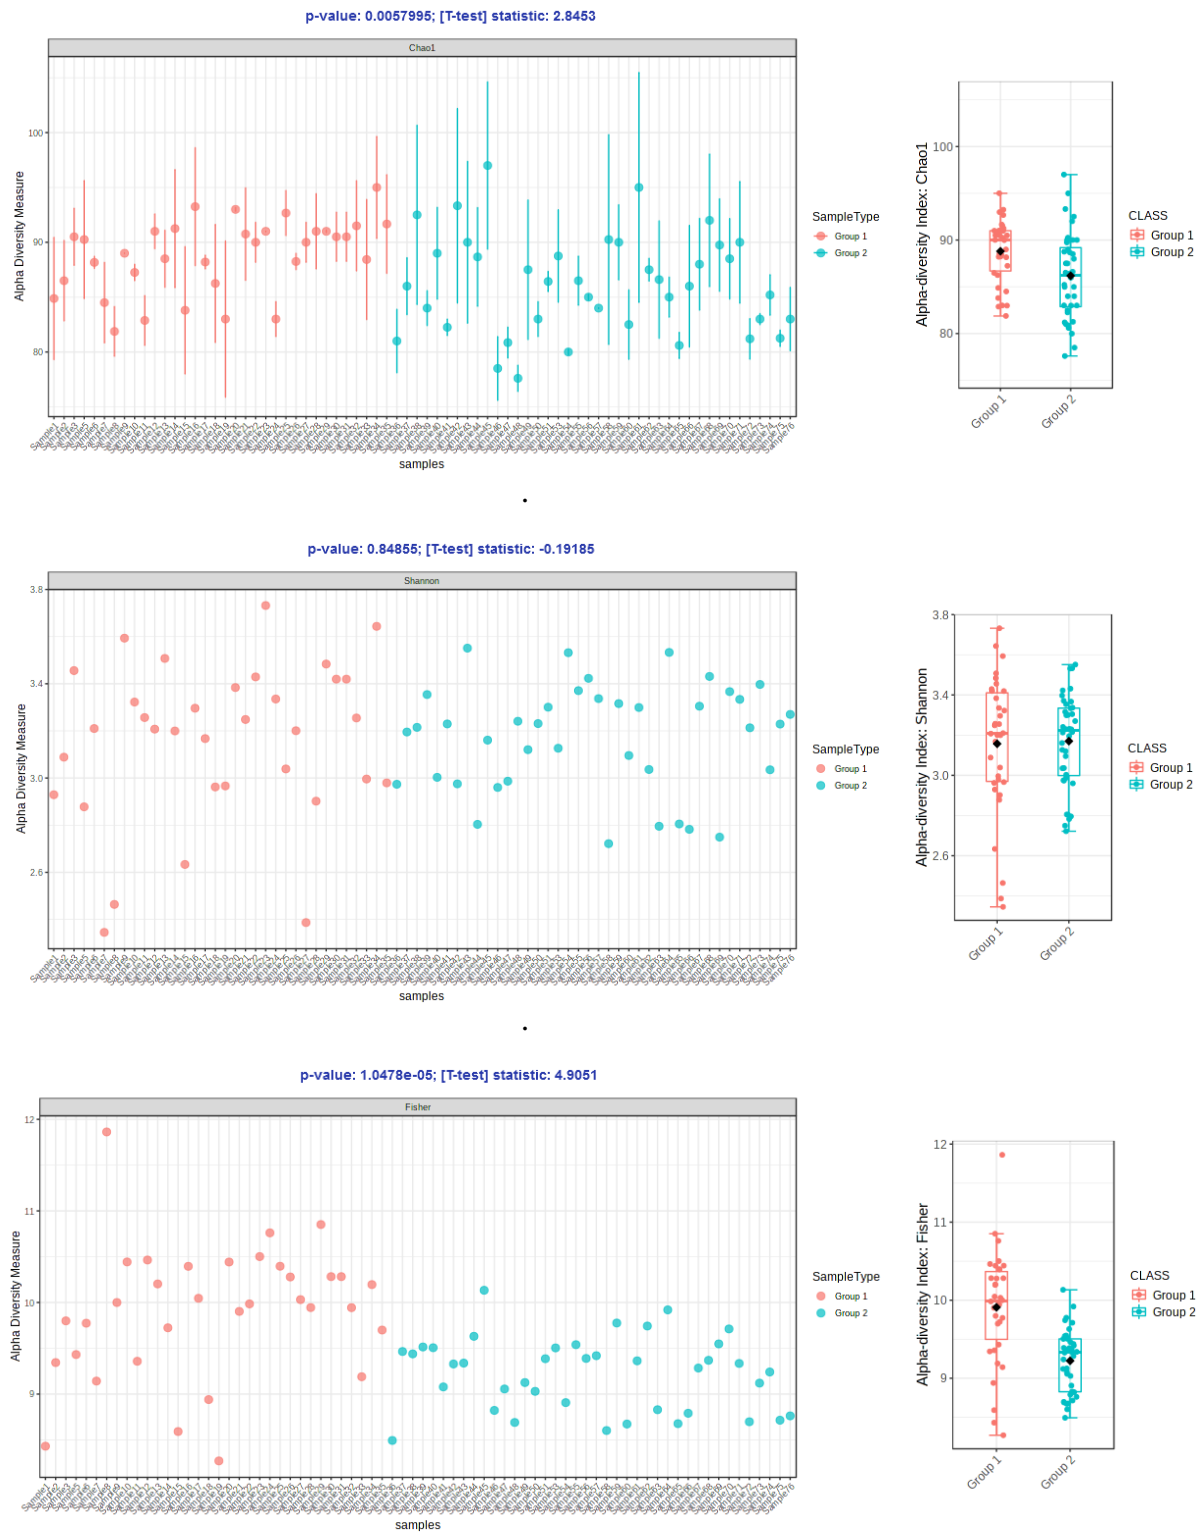

**Figure S3. Beta diversity for oral microbiota.**

[PERMANOVA] F-value: 13.231; R-squared: 0.11384; p-value < 0.001

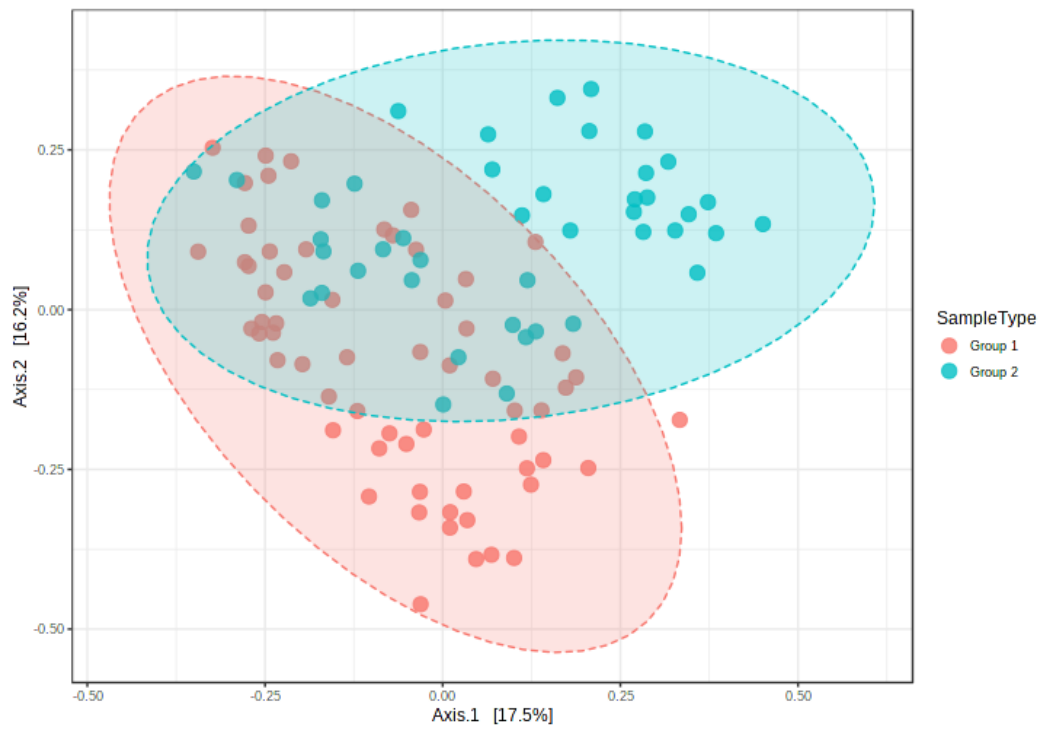

**Figure S4. Beta diversity for fecal microbiota.**

[PERMANOVA] F-value: 12.923; R-squared: 0.15218; p-value < 0.001

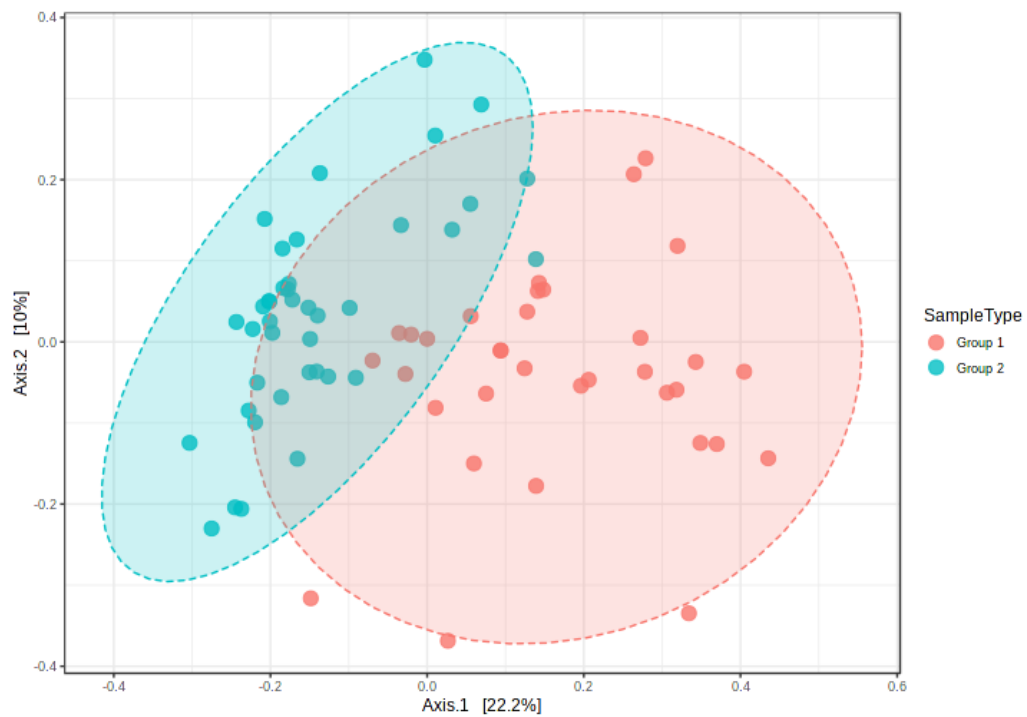

Supplement: s1 [file s1]
